1 Multiple infection of cells changes the dynamics of basic  
2 viral evolutionary processes  
3  
4

5 Dominik Wodarz<sup>1,3\*</sup>, David N. Levy<sup>2</sup>, and Natalia L. Komarova<sup>3,1</sup>  
6

7 1: Department of Ecology and Evolutionary Biology, Steinhaus Hall, University of Cali  
8 fornia, Irvine CA 92697  
9

10 2: Department of Basic Science, 921 Schwartz Building, New York University College of  
11 Dentistry, New York, NY 10010, USA.

12 3: Department of Mathematics, Rowland Hall, University of California, Irvine, CA 92697.  
13  
14

15 \* Communicating author: email: [dwodarz@uci.edu](mailto:dwodarz@uci.edu), tel: 949-824-2531.  
16  
17  
18

19 Key Words: Multiple infection, Evolutionary Dynamics, Virus evolution, Mathematical  
20 Models.  
21  
22  
23

## 24 **Abstract**

25 The infection of cells by multiple copies of a given virus can impact virus evolution in a  
26 variety of ways, for example through recombination and reassortment, or through intra-  
27 cellular interactions among the viruses in a cell, such as complementation or interfer-  
28 ence. Surprisingly, multiple infection of cells can also influence some of the most basic  
29 evolutionary processes, which has not been studied so far. Here, we use computational  
30 models to explore how infection multiplicity affects the fixation probability of mutants, the  
31 rate of mutant generation, and the timing of mutant invasion. This is investigated for  
32 neutral, disadvantageous, and advantageous mutants. Among the results, we note sur-  
33 prising growth dynamics for neutral and disadvantageous mutants: Starting from a sin-  
34 gular mutant-infected cell, an initial growth phase is observed which is more characteris-  
35 tic of an advantageous mutant and is not observed in the absence of multiple infection.  
36 Therefore, in the short term, multiple infection increases the chances that neutral or dis-  
37 advantageous mutants are present. Following this initial growth phase, however, the  
38 mutant dynamics enter a second phase that is driven by neutral drift or negative selec-  
39 tion, respectively, which determines the long-term fixation probability of the mutant.  
40 Contrary to the short-term dynamics, the probability of mutant fixation, and thus exist-  
41 ence, is lower in the presence compared to the absence of multiple infection, and de-  
42 clines with infection multiplicity. Hence, while infection multiplicity promotes mutant ex-  
43 istence in the short term, it makes it less likely in the longer term. Understanding of the-  
44 se dynamics is essential for the investigation of more complex viral evolutionary pro-  
45 cesses, for which the dynamics described here form the basis. We demonstrate rele-  
46 vance to the interpretation of experiments in the context of published data on phage  $\phi 6$   
47 evolution at low and high multiplicities.

48

49

50

51

52

53

54

55

## 56 **Introduction**

57 RNA viruses are characterized by very high mutation rates that are orders of magnitude  
58 faster than DNA viruses, due to the lack of proof-reading ability in RNA templated poly-  
59 merases [1,2]. This, together with the typically large population sizes and rapid replica-  
60 tion, promotes the generation of a large amount of genetic diversity that allows rapid  
61 adaptation to environmental challenges. The evolutionary dynamics of RNA viruses  
62 have been extensively studied in a variety of contexts [3-5]. Much of this work has  
63 viewed the virus genome as a solitary entity, where a specific gene in a given virus  
64 maps directly to its phenotype. It, however, has been demonstrated experimentally that  
65 genetically diverse viruses of the same species frequently co-habit a single cell, result-  
66 ing in a variety of positive and negative interactions [6-12]. If different virus strains can  
67 interact in such ways, the “social structure” of the virus population becomes an im-  
68 portant determinant of virus evolution, because interactions among viruses within cells  
69 can determine the response to selection and the level of genetic variation in the popula-  
70 tion [6,13-15]. Numerous examples of interactions among viruses in cells have been  
71 documented. Among positive interactions, viral complementation has been observed in  
72 several cases, leading to the persistence of inferior mutants [16-18]. Negative interac-  
73 tions are also possible, ranging from straightforward competitive interactions between  
74 viruses in a cell to the inhibition of the viral replicative potential [13,19,20]. Besides com-  
75plementary and inhibitory interactions, different viruses coinfecting the same cell can  
76 exchange genetic information by recombination, for retroviruses such as HIV, and by  
77 reassortment for segmented viruses (e.g. influenza virus).

78           The effect of infection multiplicity (virus copies per cell) on evolutionary outcome  
79 has been examined in a variety of studies with different viruses[16,17,19-24]. Interest-  
80 ing results were obtained using the RNA phage  $\phi 6$  [21,22]. For example, at high multi-  
81 plicities of infection, defectors evolved that lowered the fitness of the phage population,  
82 which was not observed at low MOI. In a different study, viral diversity was found to be  
83 lower at high infection multiplicities, arguing that viral segmentation might have evolved  
84 for reasons other than the benefits of sex [23]. In the context of HIV-1, multiple infection  
85 has been shown to influence the latent state of integrated viruses [24]. That is, a latent  
86 virus in a cell can become activated through complementation when the cell is addition-  
87 ally infected by a productive virus. Overall, such work has shown that the effect of multi-  
88 ple infection on evolution is multi-factorial and complex.

89

90           While such complex social interactions certainly affect evolutionary dynamics in  
91 interesting ways that remain to be studied further, multiple infection of cells can also  
92 have the potential to influence basic viral evolutionary processes in simpler settings,  
93 which has so far remained under-explored. A solid understanding of the effect of multi-  
94 plicity on the most basic evolutionary processes forms the underpinning for exploring  
95 more complicated scenarios. Here, we seek to contribute to this understanding with the  
96 help of evolutionary mathematical models. We investigate how infection multiplicity in-  
97 fluences: (1) the fixation probability of a mutant virus starting from a single mutant-  
98 infected cell placed into a wild-type virus population at equilibrium, (2) the time until  
99 generation of the first mutant, and (3) the time to fixation in a model where mutant vi-

100 ruses are produced from wild-types with a defined rate. This is done in the context of  
101 neutral, disadvantageous, and advantageous mutants.

102

### 103 **The computational modeling framework**

104 We study the evolutionary dynamics with a stochastic agent-based model because this  
105 allows for a natural formulation of the multiple infection process [25]. The model con-  
106 sists of  $N$  spots, which can be either empty, contain an uninfected cell, or contain an in-  
107 fected cell. Every time step, the system is randomly sampled  $N$  times, and the chosen  
108 spots are updated according to specific rules. If the chosen spot is empty, there is a  
109 probability  $L$  to produce an uninfected cell. If the sampled spot contains an uninfected  
110 cell, it can die with a probability  $D$ . If the sampled spot contains an infected cell, two  
111 events can happen. The cell can die with a probability  $A$ , and it can initiate an infection  
112 event with a probability  $B$ . If an infection event is initiated, a target spot is chosen ran-  
113 domly from the whole system. If that spot contains a susceptible cell, the infection event  
114 occurs, otherwise it is aborted. If the susceptible cell is an uninfected cell, it becomes  
115 infected with one virus. If the cell is already infected, its multiplicity is increased by one.  
116 The probability of an infected cell to die, as well as the probability to transmit a virus to  
117 another cell is assumed to be independent of infection multiplicity (different assumptions  
118 are explored below). The model assumes perfect mixing of viruses and cells.

119

120 The average dynamics of this system can be captured by ordinary differential  
121 equations. Denoting uninfected cells by  $y_0$  and cells infected by  $i$  viruses by  $y_i$ , the equa-  
122 tions are given as follows:

$$\frac{dy_0}{dt} = \lambda \left(1 - \frac{x+v}{k}\right) - dy_0 - \frac{\beta y_0 v}{k},$$
$$123 \quad \frac{dy_i}{dt} = \frac{\beta y_{i-1} v}{k} - ay_i - \frac{\beta y_i v}{k}, \quad i > 0, \quad (1)$$

where  $v = \sum_{i=1}^{\infty} y_i$ .

124 The variable  $v$  denotes the sum of all infected cells, which is proportional to the number  
125 of free viruses if free virus is in a quasi-steady state [26]. For numerical integration, this  
126 ODE formulation requires truncation at a maximum multiplicity,  $n$ , which needs to be  
127 large enough in computer simulations such that the population  $y_n$  remains negligible  
128 [25]. The virus establishes a persistent infection if its basic reproductive ratio,

129  $R_0 = \frac{\lambda \beta}{(\lambda + kd)a}$ , is greater than one. In this case, the dynamics converge to a stable

130 equilibrium given by

131  $y_0^* = \frac{ak}{\beta}$ ,  $\sum_{i=1}^n y_i^* = \frac{k(\lambda \beta - \lambda a - dak)}{\beta(\lambda + ak)}$ .

132 In the agent-based model, the populations will fluctuate around this equilibrium, due to  
133 the stochastic nature of the system, and the population of cells will be characterized by  
134 a given average infection multiplicity (Figure 1A & B).

135

136 When a mutant virus is considered, there are two virus strains in the system that  
 137 need to be tracked. The model follows cell populations that contain  $i$  copies of the wild-  
 138 type virus, and  $j$  copies of the mutant virus. If a coinfecting cell is chosen for infection,  
 139 the virus strain to be transmitted is chosen randomly based on the fraction of the virus in  
 140 the cell. Thus, the wild-type virus is chosen with a probability given by  $i/(i+j)$ , and the  
 141 mutant virus is chosen with probability  $j/(i+j)$  [25]. Again, the average dynamics of this  
 142 system can be captured by ordinary differential equations. Denoting uninfected cells by  
 143  $y_{00}$  and cells infected with  $i$  copies of the wild-type virus and  $j$  copies of the mutant virus  
 144 by  $y_{ij}$ , the equations are given as follows:

$$\frac{dy_{00}}{dt} = \lambda \left(1 - \frac{y_{00}v_1 + v_2}{k}\right) - dy_{00} - \frac{\beta_1 y_{00}v_1}{k} - \frac{\beta_2 y_{00}v_2}{k},$$

$$145 \quad \frac{dy_{ij}}{dt} = \frac{\beta_1 y_{i-1,j}v_1}{k} + \frac{\beta_2 y_{i,j-1}v_2}{k} - ay_{ij} - \frac{\beta_1 y_{i,j}v_1}{k} - \frac{\beta_2 y_{i,j}v_2}{k}, \quad i+j > 0, \quad (2)$$

where  $v_1 = \sum_{i+j>0} \frac{i}{i+j} y_{ij}$ ,  $v_2 = \sum_{i+j>0} \frac{j}{i+j} y_{ij}$ .

146 The variables  $v_1$  and  $v_2$  represent the sum of the fractions of the respective virus strains  
 147 in the cell. This is proportional to the free virus populations if the rate of virus production  
 148 is independent of multiplicity and if the virus is assumed to be in a quasi-steady state.  
 149 The relative fitness of the two virus strains is determined by differences in the infection  
 150 rates,  $\beta_1$  and  $\beta_2$ . If these two rates are identical, the two virus strains are competitively  
 151 neutral. For numerical integration, the system is truncated by only retaining the equa-  
 152 tions with  $i+j \leq n$ , where  $n$  is sufficiently large.

153

## 154 **Varying the infection multiplicity**

155 The goal of this work is to compare the evolutionary dynamics in settings where the  
156 multiplicity of infected cells is varied. This is achieved by increasing the infection proba-  
157 bility  $B$ , because higher infection probabilities correlate with larger infection multiplicities  
158 at equilibrium, as shown in Figure 1C.

159

160

## 161 **Evolutionary dynamics of neutral mutants**

162 We first consider the evolutionary spread of neutral mutants, i.e. the model parameters  
163 of the wild-type and mutant are identical. Different evolutionary endpoints will be con-  
164 sidered in turn.

165

166 **Mutant fixation probability:** We initialize the agent-based simulation by placing one  
167 cell with a single copy of the mutant virus (and no wild-type virus) into a population  
168 where the wild-type virus is present at equilibrium levels. The computer simulation was  
169 run repeatedly, and the fraction of simulations were determined that resulted in the fixa-  
170 tion of the mutant. This is defined by the presence of the mutant virus, while the wild-  
171 type virus has gone extinct; realizations of the simulation in which both populations went  
172 extinct were not observed, and the simulation was set up to not count such events  
173 should they occur. The mutant fixation probability was determined for increasing infec-  
174 tions rates, which correlate with higher infection multiplicities (Figure 1C). Systems with



175 and without multiple infection were compared. In particular, to simulate the absence of  
176 multiple infection, infection events were aborted if the target cell was already infected  
177 with a virus. In the absence of multiple infection, the fixation probability of a neutral mu-  
178 tant is given by  $1/N_{\text{cells}}$ , where  $N_{\text{cells}}$  denotes the number of wt-infected cells at equilibri-  
179 um before mutant introduction [27-29] (blue line, Figure 2A). This was verified by numer-  
180 ical simulations (not shown). The simulation results in the presence of multiple infection  
181 are shown in Figure 2A (black line, solid circles). For relatively low infection multiplicities  
182 (low infection probability, B), the observed fixation probability converges to the values in  
183 the absence of multiple infection, which is expected. The fixation probability, however,  
184 declines with increasing multiplicity, below the levels seen in the absence of multiple in-  
185 fection. Using the intuition from the theory of neutral evolution [27-29], in the presence of  
186 multiple infection, the fixation probability should be given by  $1/N_{\text{viruses}}$ , where  $N_{\text{viruses}}$  is  
187 the total number of viruses across all cells in the system; this is shown by the green line  
188 in Figure 2A. The observed fixation probability of the neutral mutant (black circles, Fig-  
189 ure 2A), however, is significantly higher than this.

190

191 The reason for this discrepancy is that there are two phases in the virus dynam-  
192 ics that contribute to this result. The average mutant dynamics are shown in Figure 2B,  
193 based on simulations of ordinary differential equation model (2). We observe that the  
194 population of mutant infected cells (which includes all cells that contain at least one mu-  
195 tant) initially grows, as if it were advantageous. This is followed by convergence towards  
196 a neutrally stable equilibrium (denoted by  $N_{\text{neut}}$ , which depends on the initial mutant  
197 population size, Figure 2B). The initial growth phase, and hence, the initial advantage of

218 the mutant, derives from the fact that in addition to uninfected cells, wt-infected cells al-  
219 so provide a target for new mutant infections. In contrast, new wt-infected cells can ini-  
220 tially only be generated by viral entry into uninfected cells, since superinfection of wt-  
221 infected cells by more wt-virus does not result in the spread of the wild-type virus popu-  
222 lation. As the mutant spreads, this advantage diminishes and the dynamics enter the  
223 long-term neutral phase. This is because the mutant viruses become distributed among  
224 cells also containing wild-type virus and the initial asymmetry in growth dynamics van-  
225 ishes. The initial advantageous phase of the dynamics accounts for the observed fixa-  
226 tion probability that is higher than expected from the straightforward application of the  
227 neutral evolution argument. In fact, the number of mutant viruses (across all cells) at  
228 this neutral equilibrium,  $N_{\text{neut}}$ , predicts the fixation probability, which is given by  
229  $N_{\text{neut}}/N_{\text{viruses}}$ , where  $N_{\text{viruses}}$  is the total number of viruses before introduction of the mu-  
230 tant. This is shown in Figure 2C, where simulation results (black) are compared to the  
231 value of  $N_{\text{neut}}/N_{\text{viruses}}$  (red). For this calculation,  $N_{\text{neut}}$  is determined by numerical integra-  
232 tion of the ODEs.

213

214 In Figure 2A, the line with open circles depicts the results of additional simula-  
215 tions, which started from different initial conditions. Instead of introducing one cell that  
216 contains a single mutant virus, the mutant was placed into a randomly chosen (possibly  
217 infected) cell after the wild-type population had equilibrated. The fraction of runs in  
218 which mutants reached fixation was recorded. This corresponds to a scenario where the  
219 mutant was generated from the wild-type virus by mutational processes, and the fate of  
220 this mutant was followed for each realization of the simulation. Because mutant place-

221 ment into a cell was probabilistic, in each simulation, the mutant virus was introduced  
222 into a different configuration, co-resident with different numbers of wild-type viruses  
223 within the cell. As seen in Figure 2A, the decline of the observed fixation probability of  
224 the neutral mutant with higher infection multiplicities is more pronounced in this case,  
225 and the fixation probability is closer to the value of  $1/N_{\text{viruses}}$ , but still higher. This makes  
226 intuitive sense, because the initial “advantageous” phase of the mutant dynamics is now  
227 less pronounced, due to intracellular competition of the first mutant virus with the wild-  
228 type.

229

230 **Time to appearance of first mutant:** Another important evolutionary observable is the  
231 rate with which mutants are generated. This is explored here by quantifying the time it  
232 takes until the first mutant has been generated. To do this, we used a model that in-  
233 cluded mutational processes. When a wild-type virus was chosen for transmission to a  
234 new cell, it was assumed that a mutation occurred with a rate  $p_{\text{mut}}$ . Biologically, this can  
235 correspond to mutations that occur upon production of the offspring virus, or that occur  
236 during the subsequent infection event (such as in retroviruses). For practical purposes,  
237 we chose a relatively high rate of  $p_{\text{mut}}=3.5 \times 10^{-5}$  per bp per generation, which is the mu-  
238 tation rate characteristic of HIV [30]. The dependence on infection multiplicity was ex-  
239 plored in the same way as described above, by varying the infection probability. We  
240 found that for all infection rates, the time to first mutant generation is always faster in the  
241 presence compared to the absence of multiple infection (Figure 3A, compare black &  
242 blue line). Further, a higher infection multiplicity (infection rate) reduced the time at  
243 which the first mutant was generated (Figure 3A). This makes intuitive sense. A higher

244 infection rate / multiplicity corresponds to more infection events, which in turn corre-  
245 sponds to more mutation events in this model.

246

247 **Time to mutant fixation in a model with mutations:** The above results indicate the  
248 existence of a tradeoff with respect to the effect of infection multiplicity. A higher infec-  
249 tion multiplicity results in the more frequent generation of mutants. At the same time,  
250 however, it also leads to a lower probability of such mutants to invade and to fixate. The  
251 current section explores this tradeoff by using the model version with mutational pro-  
252 cesses and determining the time it takes for the mutant population to invade. In addition  
253 to wild-type giving rise to mutant viruses, however, we also need to account for back-  
254 mutations, since this counteracts the mutant expansion dynamics. In these simulations,  
255 the mutants are repeatedly generated (and eliminated at the same rate) and drift sto-  
256 chastically. Because of the occurrence of back-mutations, mutant fixation is not an ab-  
257 sorbing state. To capture the effect of the tradeoff between increased mutant production  
258 and reduced invasion potential, we therefore recorded the time until the mutant reached  
259 90% of the whole virus population for the first time (we refer to this event as “mutant in-  
260 vasion”). The results are shown by black circles in Figure 3B as a function of infection  
261 multiplicity. The corresponding results for simulations without multiple infection are  
262 shown in the blue line (Figure 3B). We find that multiplicity influences the time to mutant  
263 invasion in a non-monotonous way. For low viral infection rates (and hence low infection  
264 multiplicities), an increase in infection rate and multiplicity results in a reduced time to  
265 mutant invasion, which is below the time observed without multiple infection. As the in-  
266 fection rate and multiplicity are increased further, however, the time to mutant fixation

267 becomes longer and rises above that observed in the absence of multiple infection (Fig-  
268 ure 3B). Therefore, for moderate infection multiplicities, multiple infection speeds up mu-  
269 tant invasion. For higher infection multiplicities, multiple infection slows down mutant in-  
270 vasion.

271

272

### 273 **Disadvantageous mutants**

274 Next we studied the evolutionary dynamics of slightly disadvantageous (0.05% fitness  
275 cost) mutants. The rules of the model are identical to those assumed for neutral mu-  
276 tants. In addition, once a virus was picked to infect a target cell, we assumed that this  
277 process failed with a probability 0.05% if this virus was a mutant, while it always suc-  
278 ceeded if the selected virus was wild-type. In the absence of multiple infection, we nu-  
279 merically confirmed (not shown) that when one mutant-infected cell is introduced into a  
280 wild-type virus population at equilibrium, the fixation probability of the mutant is given by

$$281 \frac{1-(1/r)}{1-1/r^{N_{\text{cells}}}}, \quad (3)$$

282 which is a formula derived from the Moran Process [31]. Here,  $r$  expresses the disad-  
283 vantage of the mutant relative to the wild type, and  $N_{\text{cells}}$  denotes the number of wild-  
284 type infected cells at equilibrium before the mutant is introduced (see blue line, Figure  
285 4A). In the context of multiple infection, the number of viruses rather than the number of

286 cells should be the relevant population size, and hence by extension, the equivalent fix-  
287 ation probability would be given by

$$288 \quad \frac{1-(1/r)}{1-1/r^{N_{\text{viruses}}}}, \quad (4)$$

289 where  $N_{\text{viruses}}$  denotes the number of viruses across all infected cells (For reference, this  
290 is plotted by the green line in Figure 4A).

291

292 First, the simulations were started with one cell containing a single mutant virus being  
293 placed into a wild-type virus population at equilibrium (black closed circles, Figure 4A).  
294 Similar trends are observed compared to neutral mutants. The fixation probability of the  
295 disadvantageous mutant is found to be lower in the presence compared to the absence  
296 of multiple infection (Figure 4A, black closed circles and blue diamonds), and decreases  
297 with higher infection multiplicities. This decrease of the fixation probability with higher  
298 infection multiplicity is more pronounced than for neutral mutants. Nevertheless, the mu-  
299 tant fixation probability observed in the simulations is significantly higher than the one  
300 predicted by formula (4) (green line, Figure 4A). One reason for the higher fixation  
301 probability is the same as for neutral mutants. Despite its replicative disadvantage, the  
302 mutant initially enjoys an advantage over the wild-type virus, because in addition to un-  
303 infected cells it can also spread by entering wt-infected cells. Using the ODE model (2),  
304 this is shown in Figure 4B. The mutant cell population first rises. This is followed by a  
305 decline phase towards extinction, due to the assumed replicative disadvantage. The  
306 peak of the mutant dynamics curve is approximately the same as the neutral equilibrium

307 that was observed for neutral mutants above ( $N_{\text{neut}}$ ). Hence, we hypothesized that the  
308 fixation probability of a disadvantageous mutant could be given by the Moran process  
309 formula assuming that the initial number of mutant viruses is given by  $N_{\text{neut}}$ , i.e. by

$$310 \frac{1 - (1/r)^{N_{\text{neut}}}}{1 - 1/r^{N_{\text{viruses}}}} \quad (5)$$

311 While this formula can predict the observed mutant fixation probability with reasonable  
312 accuracy for relatively low infection multiplicities (Figure 4C, grey diamonds), the ob-  
313 served fixation probability is significantly larger than this measure at higher multiplicities.  
314 The reason for this discrepancy seems to be that in the context of our model formula-  
315 tion, there are two levels at which mutant and wild-type viruses compete with each oth-  
316 er: (i) Within a cell, a virus strain is picked for transmission with a probability given by  
317 the fraction of this strain in the cell. Hence the mutant is neutral with respect to the wild-  
318 type at this level. (ii) Between cells, the mutant is disadvantageous compared to the  
319 wild-type because it has a reduced probability to enter a new target cell (given by  $r < 1$ ).  
320 Therefore, the extent of the mutant fitness disadvantage is actually less than expressed  
321 by  $r$ , and the overall fitness of the mutant should be given by a value that lies between  $r$   
322 and 1. The importance of this effect, however, should be influenced by the average mul-  
323 tiplicity of the infected cells: If it is low, many cells contain either the mutant or the wild-  
324 type virus alone, and then the within-cell competition plays little role. In contrast, if the  
325 average infection multiplicity is high, most cells are likely to contain both mutant and  
326 wild-type virus, and the within-cell competition will play an important role. The overall  
327 fitness disadvantage of the mutant can thus be captured phenomenologically by an ex-  
328 pression that places it between  $r$  and 1, weighed by the average infection multiplicity:

329 
$$r' = 1 + \frac{(r-1)(m+1)}{2m}. \quad (6)$$

330 The parameter  $m$  denotes the average multiplicity among infected cells. If mutant fitness  
331  $r'$  is used in formula (5), we obtain a prediction that matches the fixation probability ob-  
332 tained in the computer simulation (red crosses superimposed on black circles in Figure  
333 4C).

334

335 The curve with black open circles in Figure 4A again depicts the results of simu-  
336 lations in which the mutant was placed randomly in one of the available cells, and where  
337 the fate of the mutant was tracked. Because the first mutant virus now arises in a cell  
338 that could also contain wild-type viruses, the initial advantage of the mutant is less pro-  
339 nounced, as was the case for the neutral mutant. Hence, the mutant fixation probability  
340 is lower compared to that starting with a single mutant virus alone in a cell (closed black  
341 circles).

342

343 There is again a tradeoff between reduced fixation probabilities and the in-  
344 creased rates of mutant production with higher infection multiplicity (which is independ-  
345 ent of mutant fitness). Again we recorded the time it takes for the mutant to reach 90%  
346 of the total virus population for the first time. The trend is similar to that for neutral mu-  
347 tants: at moderate infection multiplicities, multiple infection speeds up mutant invasion,  
348 but at higher multiplicities it slows down invasion (Figure 4D). The range of multiplicities  
349 over which mutant invasion is slower in the presence compared to the absence of multi-



350 ple infection is wider for disadvantageous compared to neutral mutants (compare Fig-  
351 ures 3B and 4D). Additionally, the extent to which multiple infection slows down mutant  
352 invasion is significantly stronger for disadvantageous mutants. Hence, multiple infection  
353 is more detrimental for mutant invasion for disadvantageous compared to neutral mu-  
354 tants.

355

356

### 357 **Advantageous mutants**

358 Finally, we examined the evolutionary dynamics of advantageous mutants, assuming  
359 different degrees of mutant advantages (0.05%, 0.1%, 1%, Figure 5 A, B, C, resp.). The  
360 fitness advantage of the mutant was implemented similarly compared to the model for  
361 disadvantageous mutants: We assumed an overall infection probability that was 0.05%,  
362 0.1%, and 1% higher than the value of the parameter  $B$ . When a mutant virus was se-  
363 lected to enter a target cell, this process was assumed to always succeed. When the  
364 wild-type virus was selected, there was a 0.05%, 0.1%, and 1% probability of failure. In  
365 this way, the wild-type virus had infection probability  $B$ , while the mutant virus had an  
366 overall higher infection probability. In the absence of multiple infection, the fixation  
367 probability is again given by formula (3) (see the blue lines in Figure 5(A-C)) derived  
368 from the Moran process, which we verified numerically (not shown). The parameter  $r > 1$   
369 now measures the relative advantage of the mutant virus. As before, the green line  
370 shows formula (4), which is the Moran-process prediction for the fixation probability as-

371 suming that virus population size is given by the total number of viruses across all cells  
372 (rather than the number of infected cells).

373

374 We again start from a single cell containing one mutant virus paced into a wild-  
375 type virus population at equilibrium, and determine the mutant fixation probabilities  
376 (shown with black closed circles in Figure 5(A-C) for different infection probabilities and  
377 hence multiplicities). The mutant fixation probability first declines with infection multiplici-  
378 ty (infection rate), and subsequently increases to levels that are larger than those ob-  
379 served without multiple infection. If the mutant has a larger advantage compared to the  
380 wild-type, this increase in the fixation probability is more pronounced (compare panels  
381 A, B & C of Figure 5). Hence, for sufficiently advantageous mutants, multiple infection  
382 largely increases the chances of mutant fixation.

383

384 The insets in panels (A-C) show that the fixation probability of the advantageous  
385 mutant is again accurately predicted by formula (5) derived from the Moran process,  
386 where the overall mutant fitness  $r'$  is calculated by the empirical formula (6) (see red  
387 crosses superimposed on black circles). As before, this assumes that the initial number  
388 of mutant viruses is given by the neutral equilibrium ( $N_{\text{neut}}$ , described in the context of  
389 neutral mutants above). This makes sense because the initial phase of mutant spread  
390 from the first cell (that only contains mutant virus) is similar for all mutant types as long  
391 as the fitness difference is not too large. Only after this initial virus dissemination does  
392 the competition between the two virus strains start to matter.

393

394           The open black circles show the results of simulations in which the mutant was  
395 generated randomly in any of the available cells once the wild-type virus population had  
396 equilibrated. Now, a drastically different trend is observed: the observed mutant fixation  
397 probability declines monotonically with infection multiplicity, as is also the case in the  
398 curve predicted by formula (4) (Figure 5(A-C), compare open circles and green line).  
399 The larger the extent of the mutant advantage, the closer the observed fixation probabil-  
400 ity is compared to the green line. In addition, we note that for more pronounced mutant  
401 advantages, the mutant fixation probability becomes largely independent of infection  
402 rate and hence multiplicity (Figure 5C). This indicates that for advantageous mutants,  
403 the nature of the initial conditions plays a very important role in determining how multi-  
404 ple infection influences the probability of mutant fixation.

405

406           As before, we also considered the physiologically more relevant scenario where  
407 a wild-type population at equilibrium is allowed to mutate with a probability  $p_{\text{mut}}$  per in-  
408 fection, thus repeatedly giving rise to the mutant virus. We find that the time to mutant  
409 invasion is always lower in the presence compared to the absence of multiple infection,  
410 and that an increase in multiplicity reduces the time until mutant invasion (Figure 5D).  
411 This follows from the above observations that (i) the advantageous mutant fixation  
412 probability shows a weak dependence on multiplicity if the mutant is placed randomly  
413 into any of the cells, and (ii) the rate of mutant generation is faster for higher infection

414 multiplicity. Hence, in the context of advantageous mutants, multiple infection speeds  
415 up mutant invasion.

416

### 417 **Increased viral output in multiply infected cells**

418 The analysis so far assumed that the amount of virus produced by infected cells during  
419 their life-spans is the same regardless of the infection multiplicity. This means that cellu-  
420 lar factors limit the rate of virus production, and introduces an element of intracellular  
421 competition among the different virus strains. This section explores the effect of relaxing  
422 this assumption. The opposite extreme would be to assume that the rate of virus pro-  
423 duction is only driven by viral factors and that there is thus no intracellular competition  
424 among virus strains. In this case, the viral output from infected cells goes up with infec-  
425 tion multiplicity. In particular, cells containing two viruses would produce twice as many  
426 offspring viruses, cells infected with three viruses would produce three times the amount  
427 of offspring virus, etc. This, however, would give rise to a positive feedback loop where  
428 higher multiplicity increases the rate of viral replication, which in turn increases the in-  
429 fection multiplicity. The biologically most reasonable assumption in this context would  
430 be that the rate of virus production is a saturating function of the number of viruses that  
431 are present in the cell. Hence, in the model, the probability for an infected cell to pass  
432 on the virus to a target cell is not given by  $B$  anymore, but by  $B(V)(1+\epsilon)/(V+\epsilon)$ , where  $V$   
433 denotes the total number of viruses in a cell. The larger the constant  $\epsilon$ , the more the  
434 rate of virus production increases with multiplicity before converging to an asymptote.  
435 Thus,  $\epsilon = 0$  corresponds to the case where viral output is independent of the multiplicity

436 of infection, and  $\epsilon \rightarrow \infty$  corresponds to the output increasing in an unlimited fashion with  
437 multiplicity. We investigated the fixation probability in the context of a neutral mutant. As  
438 the initial condition, we placed a single cell with one mutant virus into a wild-type popu-  
439 lation at equilibrium and recorded the mutant fixation probability as a function of the sat-  
440 uration constant  $\epsilon$ . The results are shown in Figure 2D (black filled circles). For low val-  
441 ues of  $\epsilon$ , the fixation probability is close to the one observed for neutral mutants, where  
442 virus output was assumed independent of infection multiplicity. As the value of  $\epsilon$  in-  
443 creases (more pronounced increase in viral output in multiply infected cells), the mutant  
444 fixation probability declines. This makes intuitive sense, because the average infection  
445 multiplicity in the cells rises with increasing values of  $\epsilon$ . The green line (Figure 2D) again  
446 shows the reference value  $1/N_{\text{viruses}}$ . As before, the observed mutant fixation probability  
447 is significantly higher than the one predicted by neutral evolutionary theory (green line),  
448 for the same reason as given in the simpler versions of the model, where the rate of vi-  
449 rus production was independent of multiplicity: the mutant dynamics first display a  
450 spread phase before the number of mutant viruses converges to a neutrally stable equi-  
451 librium ( $N_{\text{neut}}$ ). As in the simpler model in the previous sections, the fixation probability is  
452 again given by  $N_{\text{neut}}/N_{\text{viruses}}$ , as shown by the red crosses that are superimposed on the  
453 black circles in Figure 2D. Therefore, results described in the previous sections are not  
454 tied to the assumption that the rate of virus production is independent of multiplicity.

455

456

457

## 458 **Theory and data**

459 An important aspect of theoretical work is relation to experimental data. While the dy-  
460 namics of mutant fixation have not been studied in settings that vary the infection multi-  
461 plicity, the number of mutants has been quantified in experiments where the bacterio-  
462 phage  $\phi 6$  was passaged under low and high infection multiplicity scenarios [23]. It was  
463 found that after 300 generations, genetic diversity was larger at low compared to high  
464 infection multiplicities, and that this difference was mostly due to the presence of muta-  
465 tions in non-coding regions of the genome, i.e. a result of neutral mutations. This sug-  
466 gested that processes occurring at high infection multiplicity (e.g. reassortment of ge-  
467 nomic segments, sexual exchange), did not contribute to viral genetic diversity [23].

468

469 The models analyzed in our study made predictions about the average dynamics  
470 of neutral mutant viruses over time, which can be related to these experimental obser-  
471 vations. In the presence of multiple infection, the dynamics were characterized by two  
472 phases: (i) An early growth phase was observed, where the dynamics resemble those  
473 of an advantageous mutant, which is not seen with neutral mutants in the absence of  
474 multiple infection. Hence, we expect that multiple infection promotes the spread of neu-  
475 tral mutants during this initial phase, which is counter to the experimental observations  
476 [23]. (ii) This initial phase is followed by convergence of the dynamics to a neutral equi-  
477 librium, the level of which predicts the long-term fixation / extinction probability of the  
478 mutant. Fixation is less likely with than without multiple infection, and declines with  
479 higher infection multiplicities. Stated in another way, the mutant virus is more likely to go

480 extinct in the presence compared to the absence of multiple infection, and higher multi-  
481 plicities further promote mutant extinction. Therefore, during this longer term phase, the  
482 number of neutral viruses is predicted to be larger at low compared to high multiplicities.  
483 This is in agreement with the experimental data on the evolution of phage  $\phi 6$  [23].

484

485 Another complication in the interpretation of the experimental data concerns the  
486 experimental measure under consideration. The model suggests that different results  
487 can be obtained about the average number of mutants at low and high infection multi-  
488 plicities depending on whether the number of mutant-infected cells are counted, or  
489 whether the amount of free virus is compared. This is demonstrated with computer sim-  
490 ulations in Figure 6. As initial conditions, a model simulation with wild-type virus only  
491 was allowed to equilibrate, and 10% of the infected cell population was sampled to start  
492 a new growth phase. A small number of mutant viruses was added to this pool of cells  
493 and the resulting growth curves were recorded. This might mimic a virus passage,  
494 which was part of the experiments performed by Dennehy et al [23]. Many repeats of  
495 such runs were performed, and the average population sizes, as well as standard errors  
496 are plotted over time in Figure 6. Figure 6A shows that if the number of mutant-infected  
497 cells is compared, the number is larger in the presence compared to the absence of  
498 multiple infection. In contrast, Figure 6B shows the opposite if a measure proportional to  
499 the free virus population is compared. Even though more mutant-infected cells are pre-  
500 dicted in the presence of multiple infection, if the mutant virus is significantly diluted by  
501 wild-type copies within those cells, fewer mutant free viruses will be observed with mul-

502 tiple infection. The reason is the assumption that the rate of mutant virus production is  
503 proportional to the fraction of the mutant in the cell.

504

505 In summary, the models have identified two factors that can impact whether mu-  
506 tant spread is intensified in the presence or absence of multiple infection. The timing af-  
507 ter mutant introduction can determine the result, and so can the particular measure of  
508 mutant spread. These complexities are important to keep in mind when interpreting ex-  
509 perimental data.

510

511

## 512 **Discussion and Conclusion**

513 We used computational models to investigate the spread dynamics of mutant viruses in  
514 the presence of multiple infection, assuming relatively simple settings where no viral  
515 complementation, inhibition, or recombination / reassortment occurred. Nevertheless,  
516 the dynamics were found to be complex. An interesting aspect concerns neutral and  
517 disadvantageous virus mutants. During the initial stages of the dynamics, the mutant  
518 population enjoys growth instead of drifting, similar to an advantageous mutant. The  
519 reason is than an initial asymmetry confers an advantage to the mutant relative to the  
520 wild-type virus. Specifically, in a virus population that contains almost only wild-types,  
521 new wt-infected cells can only be generated by viral entry into uninfected cells. On the  
522 other hand, new mutant-infected cells can be generated both by entry into uninfected



523 cells, and by entry into wild-type infected cells. This can be tested experimentally by la-  
524 beling viruses with two different fluorescent colors and introducing a minority population  
525 of one color (the “mutant”) into a population that contains a relatively large number of  
526 uninfected cells, as well as cells infected with the virus labeled with the second color  
527 (the “wild-type”). This could visualize the spread of the mutant in both uninfected and  
528 infected cells, and it could be tested whether these dynamics are more consistent with  
529 drift or with selection. HIV-1 could be a suitable experimental system [32]. This kind of  
530 experiment could then be repeated, but with a “wild-type”-infected cell population that  
531 has down-regulated the CD4 receptor, thus blocking entry of the “mutant” virus into wt-  
532 infected cells.

533

534       Following this initial spread, the dynamics of these mutants become more typical.  
535 Hence, the neutral mutant enters the phase of neutral drift, and the disadvantageous  
536 mutant experiences a selective disadvantage. In either case, multiple infection reduces  
537 the probability that the mutant spreads stochastically through the virus population, and  
538 makes virus extinction more likely. This leads to the counter-intuitive result that multiple  
539 infection can promote the presence of neutral or disadvantageous mutants in the short  
540 term, but reduces the chances to find those mutants in the longer term. As described  
541 above, this can complicate the interpretation of experimental results.

542

543       While it is important to understand the spread dynamics of the mutants, the phys-  
544 iologically most relevant scenario assumes that mutant viruses are generated repeated-

545 ly from the wild-type virus population by mutational processes, and that the newly creat-  
546 ed mutants attempt to spread. For advantageous mutants, the overall effect tends to be  
547 that a higher infection multiplicity results in a faster invasion of the mutant: While the  
548 probability of mutant fixation does not depend significantly on infection multiplicity, the  
549 rate of mutant generation is faster for higher multiplicity. For neutral or disadvantageous  
550 mutants, however, there is a tradeoff. While the rate of mutant generation is accelerated  
551 at higher infection multiplicity, the fixation probability of the generated mutant declines  
552 with higher multiplicity. The overall effect is a reduced rate of mutant invasion at high  
553 infection multiplicities, although for moderate multiplicities, the rate of mutant invasion  
554 can be faster than in the absence of multiple infection. These complex results indicate  
555 that multiplicity does not have a straightforward and consistent effect on the rate of mu-  
556 tant invasion. For example, the evolution of immune escape mutants in chronic infec-  
557 tions that are controlled by ongoing immune responses is most likely accelerated by a  
558 higher infection multiplicity, since such mutants enjoy an instant fitness advantage. At  
559 the same time, however, other, equally important, evolutionary processes can be ham-  
560 pered at high multiplicities, such as the emergence of drug-resistant mutants before  
561 treatment initiation (standing genetic variation). Such mutants typically have a certain  
562 selective disadvantage compared to drug-sensitive viruses in the absence of treatment  
563 [33]. According to these results, it is therefore not possible to say that conditions in  
564 which viruses replicate at higher infection multiplicities either favor or hamper evolution-  
565 ary processes.

566

567           The relatively complex dependence of basic evolutionary processes on infection  
568 multiplicity form an important foundation for further explorations of viral evolution. The  
569 consequences of recombination/ reassortment, complementation, and inhibition be-  
570 tween wild-type and mutant viruses within the same cell have to be viewed as occurring  
571 on top of the basic dynamics described here in order to successfully understand the ef-  
572 fect of these more involved interactions on evolutionary outcome.

573

574

575

576

577

578

579

580

581

582

583

584

585

## 586 **Figure Legends**

587

588 **Figure 1.** Basic properties of the computational modeling approach. The agent-based  
589 model is described in the text. (A) Over time, the number of infected cells converges to-  
590 wards and equilibrium value, around which the population fluctuates stochastically. A  
591 single typical run of the simulation is shown. (B) The average infection multiplicity  
592 across all infected cells also fluctuates around a steady state. Again, single typical simu-  
593 lation run is shown. (C) The average infection multiplicity is varied by changing the in-  
594 fection probability of the virus,  $B$ , as shown. The average multiplicity was determined by  
595 running the simulation repeatedly (10,000 runs), and taking the average value at a spe-  
596 cific time point during the equilibrium phase of the dynamics. Standard deviations are  
597 plotted (almost not visible due to relatively small value). Base parameters are given as  
598 follows.  $B=0.025$ ,  $A=0.02$ ,  $L=1$ ,  $D=0.01$ ,  $N=900$ .

599

600 **Figure 2.** Evolutionary dynamics of neutral mutants. (A) Fixation probability as a func-  
601 tion of the infection probability,  $B$ . Two theoretical bounds are shown by diamonds. The  
602 blue line with diamonds shows the fixation probability in the absence of multiple infec-  
603 tion, given by  $1/N_{\text{cells}}$ , where  $N_{\text{cells}}$  is the equilibrium number of infected cells before mu-  
604 tant introduction. The green line with diamonds shows  $1/N_{\text{viruses}}$ , where  $N_{\text{viruses}}$  is the  
605 equilibrium number of viruses across all cells before mutant introduction, and was hy-  
606 pothesized to be the theoretically expected fixation probability in the presence of multi-  
607 ple infection. The circles show results of two types of computer simulations. The black

608 closed circles show the fixation probabilities in the computer simulation when one cell  
609 infected with one mutant virus is introduced into the system, where the wild-type virus  
610 population has equilibrated. The black open circles show the fixation probabilities in the  
611 computer simulation when one mutant virus is randomly placed into any of the available  
612 cells in the system where the wild-type virus population has equilibrated. Base parame-  
613 ters were:  $A=0.02$ ,  $L=1$ ,  $D=0.01$ ,  $N=900$ . The number of simulation runs varied for dif-  
614 ferent parameters due to different speeds of the computer simulation. For the black cir-  
615 cles, the number of runs for increasing values of  $B$  were: 14154839, 15577853,  
616 10415129, 18733054, 8590117, 5814742, 4518280. For open circles, the number of  
617 runs were: 29237576, 33491598, 24902642, 33231461, 28297798, 22471381,  
618 46938021. The trends described in the text are statistically significant, according to the  
619 Z test for two population proportions (very low p values, not shown). (B) Average dy-  
620 namics of neutral mutants following introduction into a system at equilibrium, given by  
621 ODE model (2). The different lines depict simulations that start from different initial con-  
622 ditions. We observe first a phase of mutant spread, followed by convergence to a neu-  
623 trally stable equilibrium. Parameters were:  $\beta=0.025$ ,  $a=0.02$ ,  $\lambda=1$ ,  $d=0.01$ ,  $k=900$ . (C)  
624 Successful theoretical prediction of the observed mutant fixation probability. The black  
625 circles show the observed fixation probabilities, which are the same as in panel A. The  
626 red crosses plot the values of  $N_{\text{neut}}/N_{\text{viruses}}$ , which accurately predict the observed fixa-  
627 tion probabilities, as explained in the text. (D) Fixation probability of a neutral mutant in  
628 the agent based model where the rate of virus production is a saturating function of in-  
629 fection multiplicity. The fixation probability is shown as a function of the parameter  $\varepsilon$ ,  
630 which determines how quickly saturation occurs. Higher values of  $\varepsilon$  correspond to a

631 more pronounced increase in viral output with multiplicity. The green line again depicts  
632 the value of  $1/N_{\text{viruses}}$ . The red line plots the value of  $N_{\text{neut}}/N_{\text{viruses}}$ , which successfully  
633 predicts the observed fixation probabilities. Parameters were:  $B=0.025$ ,  $A=0.02$ ,  $L=1$ ,  
634  $D=0.01$ ,  $N=900$ . The number of simulation runs for increasing values of  $\epsilon$  were:  
635 119736073, 117908559, 104741112, 87608798, 75812069, 64365150. The trends de-  
636 scribed in the text are statistically significant, according to the Z test for two population  
637 proportions (very low p values, not shown).

638

639

640 **Figure 3.** (A) Average time to generation of first mutant in the agent-based model with  
641 mutations. Black closed circles denote the simulation results in the presence of multiple  
642 infection, and blue open circles denote simulation results in the absence of multiple in-  
643 fection. Standard errors are shown, but are relatively small and hard to see. The num-  
644 ber of simulation runs for increasing values of  $B$  for black circles are: 166137, 403110,  
645 906346, 8000789, 8992529, 15656759, 19553451. For blue circles: 2159214, 4376870,  
646 5980191, 10651321, 11229080, 10103400, 22652139. (B) Average time until the num-  
647 ber of mutant-infected cells reached 90% of the whole infected cell population in the  
648 model with mutation and back-mutation (neutral mutants). The black closed circles  
649 show simulation results in the presence of multiple infection, the blue open circles show  
650 results without multiple infection. The simulation was started with the wild-type virus  
651 population at equilibrium. Parameters were chosen as follows:  $B=0.025$ ,  $A=0.02$ ,  $L=1$ ,  
652  $D=0.01$ ,  $\mu=3 \times 10^{-5}$ ,  $N=900$ . Standard errors are shown, which, however, are very small

653 and hard to see. For increasing values of B, we the number of simulations for the black  
654 circles was: 27629, 34858, 29688, 42050, 30574, 39744, 20570.. For blue circles:  
655 34419, 39953, 29128, 38395, 34234, 72679, 64963. Trends of how multiple infection  
656 affects the plotted measures are statistically significant according to the 2-sample t-test  
657 (very low p values, not shown).

658

659 **Figure 4.** Evolutionary dynamics of disadvantageous mutants. (A) Fixation probability  
660 as a function of the infection probability, B. Two theoretical bounds are shown by dia-  
661 monds. The blue line with diamonds shows the fixation probability in the absence of  
662 multiple infection as given by formula (3) derived from the Moran process. The green  
663 line shows the fixation probability according to formula (4) derived from the Moran pro-  
664 cess. The black closed circles show the fixation probabilities observed in the agent  
665 based simulation when one cell infected with one mutant virus is introduced into the  
666 system at equilibrium. The black open circles show the fixation probabilities observed in  
667 the agent based simulation when one mutant virus is randomly placed into any of the  
668 available cells in system at equilibrium. Base parameters were:  $B_1=0.025$ ,  $B_2=rB_1$ ,  
669  $A=0.02$ ,  $L=1$ ,  $D=0.01$ ,  $\mu=3 \times 10^{-5}$ ,  $r=0.9995$ . The number of simulation runs for increasing  
670 values of B for the black closed circles were: 101317577, 112619340, 77957298,  
671 37907585, 72473679, 47395056. For open black circles: 196598760, 225295595,  
672 168947826, 227879849, 199753392, 277735577. Trends described in the text are sta-  
673 tistically significant, according to the Z test for two population proportions (very low p  
674 values, not shown). (B) Average dynamics of disadvantageous mutants following intro-  
675 duction into a system at equilibrium, given by ODE model (2). We observe first a phase

676 of mutant spread, followed by a decline towards extinction. Different lines depict differ-  
677 ent levels of mutant disadvantage. A larger disadvantage leads to a less pronounced  
678 initial spread phase, followed by a faster decline. Parameters were:  $\beta_1=0.025$ ,  $\beta_2=r \beta_1$   
679  $a=0.02$ ,  $\lambda=1$ ,  $d=0.01$ ,  $k=900$ . The relative mutant fitness values were (from top to bot-  
680 tom)  $r=0.9995$ ,  $r=0.999$ , and  $r=0.99$ . (C) Predicting the fixation probability of disadvan-  
681 tageous mutants. The black closed circles depict the same mutant fixation probabilities  
682 as in panel A, observed in agent based simulations that started with one cell containing  
683 one mutant virus with  $r=0.9995$ . The line with grey diamonds depicts the value of formu-  
684 la (5), assuming an initial mutant virus population size of  $N_{neut}$ , and the relative mutant  
685 fitness disadvantage  $r=0.9995$ . This fails to accurately predict the observed fixation  
686 probability. The red line with crosses depicts the same formula (5), but using the com-  
687 posite mutant fitness value  $r'$ , defined in formula (6) in the text. This accurately predicts  
688 the observed fixation probability. (D) Average time until the number of infected cells  
689 containing the disadvantageous mutant reached 90% of the whole infected cell popula-  
690 tion, given by the agent-based model with mutations and back-mutations (black circles).  
691 The blue line depicts the same measure in the absence of multiple infection, determined  
692 by simulations of the agent-based model. Parameters were:  $B_1=0.025$ ,  $B_2=rB_1$ ,  $A=0.02$ ,  
693  $L=1$ ,  $D=0.01$ ,  $\mu=3 \times 10^{-5}$ ,  $N=900$ ,  $r=0.9995$ . Standard errors are shown but are relatively  
694 small and hard to see. The trends described in the text are statistically significant, ac-  
695 cording to the 2-sample t-test. The number of simulation results for increasing values of  
696 B for the black line was: 323339, 307142, 281610, 234979, 46647, 1338. For the blue  
697 line: 294547, 262278, 224520, 227618, 201695, 168677.  
698



699

700 **Figure 5.** Evolutionary dynamics of advantageous mutants. (A) Fixation probability as a  
701 function of the infection probability, B. The blue line with diamonds shows the fixation  
702 probability in the absence of multiple infection, provided by formula (3). The green line  
703 shows the prediction of formula (4). The closed black circles show the fixation probabili-  
704 ties observed in the agent based simulation when one cell infected with one mutant vi-  
705 rus is introduced into the system at equilibrium. The black open circles show the fixation  
706 probabilities observed in the computer simulation when one mutant virus is randomly  
707 placed into any of the available cells in system at equilibrium. The inset re-plots the ob-  
708 served fixation probability shown in closed black circles, and the red crosses depict the  
709 prediction given by formula (5) when the composite fitness value  $r'$  is calculated accord-  
710 ing to formula (6), as described in the text. Parameters were:  $B_1=0.025$ ,  $B_2=rB_1$ ,  
711  $A=0.02$ ,  $L=1$ ,  $D=0.01$ ,  $N=900$ ,  $r=1.0005$ . The number of simulation results for black  
712 closed circles was: 4866352, 5371603, 3577510, 4091305, 2648860, 1691486,  
713 1272341. For black open circles: 3935759, 4490230, 3313452, 4309990, 3470896,  
714 4837538, 5286726. (B,C) Same simulations, but with larger mutant advantages,  
715  $r=1.001$  for B and  $r=1.01$  for C. For B, the number of simulation runs for the closed  
716 black circles are; 7553368 , 6920249 , 6011459 , 5067733 , 3155326 , 1939997 ,  
717 1507107 . For black open circles: 17417910 , 19829787 , 14557581 , 18888450 ,  
718 15088002 , 11334612 , 19407499 . For C, closed black circles: 7519349, 6572315,  
719 5445510, 4494334, 2831424, 1767559, 1362813. For C, black open circles; 854795,  
720 773698, 702491, 681172, 547988, 407116, 333571. Trends described in the text are  
721 statistically significant, according to the Z test for two population proportions. (D) Aver-

722 age time until 90% of the infected cell population contain the advantageous mutant for  
723 the first time (black closed circles), based on the agent-based model with mutations and  
724 back-mutations, as a function of the infection probability. Standard errors are plotted,  
725 but are hard to see. The number of simulation runs are: 19839, 41663, 82828, 222263,  
726 316597, 638422, 488754. The blue line depicts the result of equivalent simulations in  
727 the absence of multiple infection. Again, standard errors are too small to see, and the  
728 number of simulation runs are: 130825, 226054, 282790, 481975, 494045, 1080864,  
729 998265. Parameters were:  $B_1=0.025$ ,  $B_2=rB_1$ ,  $A=0.02$ ,  $L=1$ ,  $D=0.01$ ,  $\mu=3\times 10^{-5}$ ,  $N=900$ ,  
730  $r=1.01$ . The trends described in the text are statistically significant, according to the 2-  
731 sample t-test.

732

733

734 **Figure 6.** Average mutant dynamics in the presence (red) and absence (blue) of multi-  
735 ple infection, based on repeated realizations (100,000) of the agent-based model with-  
736 out mutational processes. The grey dashed lines depict the standard errors. The simu-  
737 lations were started with wild-type virus only, until the system equilibrated. Then, 10% of  
738 the wild-type-infected cells were randomly selected, and renewed growth was simulat-  
739 ed, together with a minority population of mutants (30% of the wild-type population).  
740 This mimics the basic virus passage procedures in phage experiments reported by  
741 Dennehy et al [23]. (A) The number of mutant-infected cells is plotted. (B) The sum of  
742 the mutant fractions across all infected cells is plotted, which is proportional to the  
743 amount of free virus. Parameters were:  $B=0.025$ ,  $A=0.02$ ,  $L=1$ ,  $D=0.01$ ,  $N=900$ .

744

- 745 1. Domingo E, Holland JJ (1997) RNA virus mutations and fitness for survival. *Annu Rev Microbiol* 51:  
746 151-178.
- 747 2. Domingo E, Escarmis C, Sevilla N, Moya A, Elena SF, et al. (1996) Basic concepts in RNA virus evolution.  
748 *FASEB J* 10: 859-864.
- 749 3. Luring AS, Andino R (2010) Quasispecies theory and the behavior of RNA viruses. *PLoS Pathog* 6:  
750 e1001005.
- 751 4. Moya A, Holmes EC, Gonzalez-Candelas F (2004) The population genetics and evolutionary  
752 epidemiology of RNA viruses. *Nat Rev Microbiol* 2: 279-288.
- 753 5. Elena SF, Lenski RE (2003) Evolution experiments with microorganisms: the dynamics and genetic  
754 bases of adaptation. *Nat Rev Genet* 4: 457-469.
- 755 6. Bijma P (2014) The quantitative genetics of indirect genetic effects: a selective review of modelling  
756 issues. *Heredity (Edinb)* 112: 61-69.
- 757 7. Wolf JB (2000) Indirect genetic effects and gene interactions. In: Wolf JB, Brodie ED, Wade MJ,  
758 editors. *Epistasis and the evolutionary process*. New York: Oxford University Press. pp. 158-176.
- 759 8. Griffing B (1967) Selection in reference to biological groups. I. Individual and group selection applied  
760 to populations of unordered groups. *Aust J Biol Sci* 20: 127-139.
- 761 9. Sakai KI (1955) Competition in plants and its relation to selection. *Cold Spring Harb Symp Quant Biol*  
762 20: 137-157.
- 763 10. Wolf JB, Brodie Iii ED, Cheverud JM, Moore AJ, Wade MJ (1998) Evolutionary consequences of  
764 indirect genetic effects. *Trends Ecol Evol* 13: 64-69.
- 765 11. Frank SA (2007) All of life is social. *Curr Biol* 17: R648-650.
- 766 12. Moore AJ, Brodie ED, Wolf JB (1997) Interacting Phenotypes and the Evolutionary Process: I. Direct  
767 and Indirect Genetic Effects of Social Interactions. *Evolution* 51: 1352.
- 768 13. Ojosnegros S, Perales C, Mas A, Domingo E (2011) Quasispecies as a matter of fact: viruses and  
769 beyond. *Virus Res* 162: 203-215.
- 770 14. Mutic JJ, Wolf JB (2007) Indirect genetic effects from ecological interactions in *Arabidopsis thaliana*.  
771 *Mol Ecol* 16: 2371-2381.
- 772 15. Peeters K, Eppink TT, Ellen ED, Visscher J, Bijma P (2012) Indirect genetic effects for survival in  
773 domestic chickens (*Gallus gallus*) are magnified in crossbred genotypes and show a parent-of-  
774 origin effect. *Genetics* 192: 705-713.
- 775 16. Garcia-Arriaza J, Manrubia SC, Toja M, Domingo E, Escarmis C (2004) Evolutionary transition toward  
776 defective RNAs that are infectious by complementation. *J Virol* 78: 11678-11685.
- 777 17. Garcia-Arriaza J, Ojosnegros S, Davila M, Domingo E, Escarmis C (2006) Dynamics of mutation and  
778 recombination in a replicating population of complementing, defective viral genomes. *J Mol Biol*  
779 360: 558-572.
- 780 18. Gelderblom HC, Vatakis DN, Burke SA, Lawrie SD, Bristol GC, et al. (2008) Viral complementation  
781 allows HIV-1 replication without integration. *Retrovirology* 5: 60.
- 782 19. de la Torre JC, Holland JJ (1990) RNA virus quasispecies populations can suppress vastly superior  
783 mutant progeny. *J Virol* 64: 6278-6281.
- 784 20. Chumakov KM, Powers LB, Noonan KE, Roninson IB, Levenbook IS (1991) Correlation between  
785 amount of virus with altered nucleotide sequence and the monkey test for acceptability of oral  
786 poliovirus vaccine. *Proc Natl Acad Sci U S A* 88: 199-203.
- 787 21. Turner PE, Chao L (1999) Prisoner's dilemma in an RNA virus. *Nature* 398: 441-443.
- 788 22. Turner PE, Chao L (2003) Escape from Prisoner's Dilemma in RNA phage phi6. *Am Nat* 161: 497-505.

- 789 23. Dennehy JJ, Duffy S, O'Keefe KJ, Edwards SV, Turner PE (2013) Frequent coinfection reduces RNA  
790 virus population genetic diversity. *J Hered* 104: 704-712.
- 791 24. Donahue DA, Bastarache SM, Sloan RD, Wainberg MA (2013) Latent HIV-1 can be reactivated by  
792 cellular superinfection in a Tat-dependent manner, which can lead to the emergence of  
793 multidrug-resistant recombinant viruses. *J Virol* 87: 9620-9632.
- 794 25. Phan D, Wodarz D (2015) Modeling multiple infection of cells by viruses: Challenges and insights.  
795 *Math Biosci* 264: 21-28.
- 796 26. Nowak MA, May RM (2000) *Virus dynamics. Mathematical principles of immunology and virology.*:  
797 Oxford University Press.
- 798 27. Ewens WJ (2004) *Mathematical Population Genetics 1: Theoretical Introduction.* . New York:  
799 Springer.
- 800 28. Nei M (1975) *Molecular Population Genetics and Evolution.* Amsterdam, Holland: North-Holland  
801 Publishing Company.
- 802 29. Hartl DL, Clark AG (1997) *Principles of Population Genetics.* Sunderland, USA: Sinauer Associates.
- 803 30. Mansky LM, Temin HM (1995) Lower in vivo mutation rate of human immunodeficiency virus type 1  
804 than that predicted from the fidelity of purified reverse transcriptase. *J Virol* 69: 5087-5094.
- 805 31. Komarova NL, Sengupta A, Nowak MA (2003) Mutation-selection networks of cancer initiation:  
806 tumor suppressor genes and chromosomal instability. *J Theor Biol* 223: 433-450.
- 807 32. Levy DN, Aldrovandi GM, Kutsch O, Shaw GM (2004) Dynamics of HIV-1 recombination in its natural  
808 target cells. *Proc Natl Acad Sci U S A* 101: 4204-4209.
- 809 33. Cong ME, Heneine W, Garcia-Lerma JG (2007) The fitness cost of mutations associated with human  
810 immunodeficiency virus type 1 drug resistance is modulated by mutational interactions. *J Virol*  
811 81: 3037-3041.

812

813

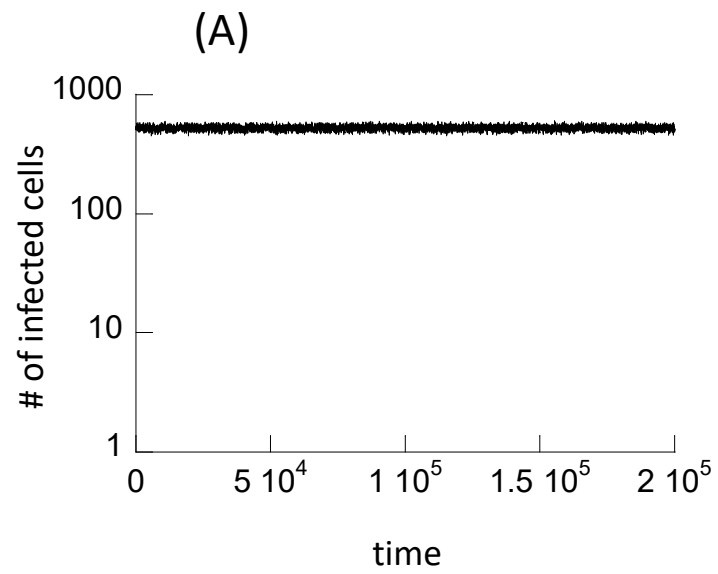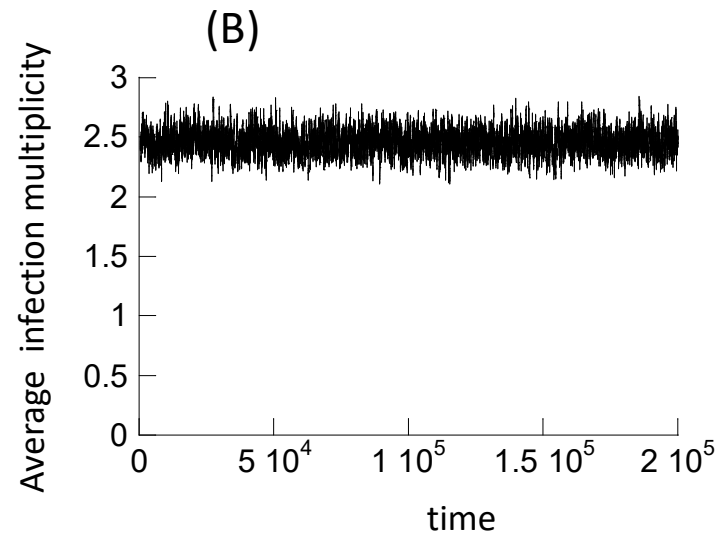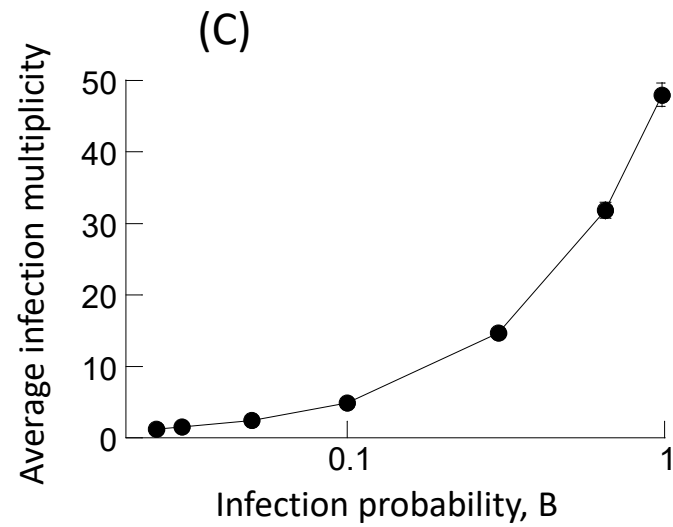

Fig 1

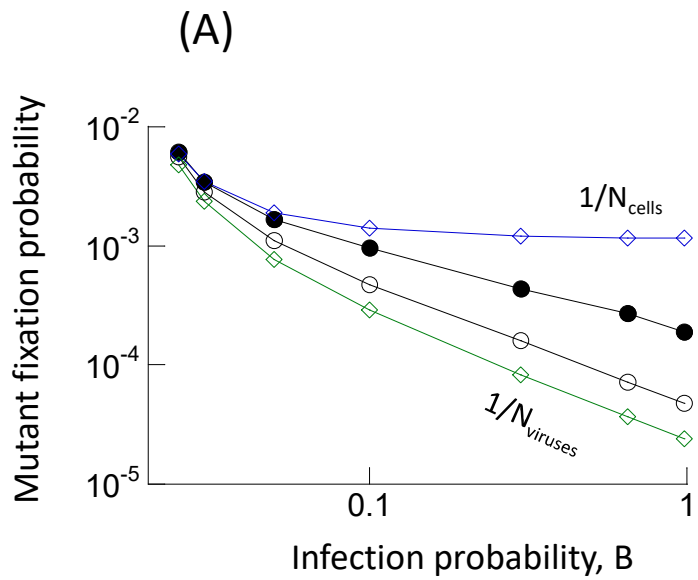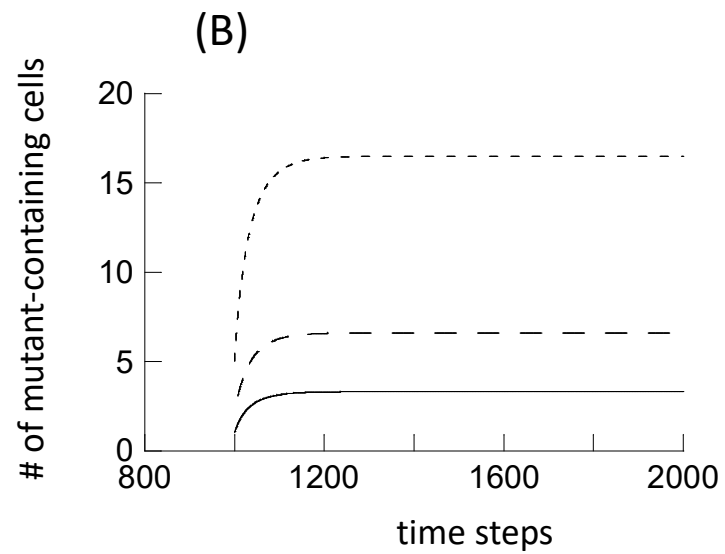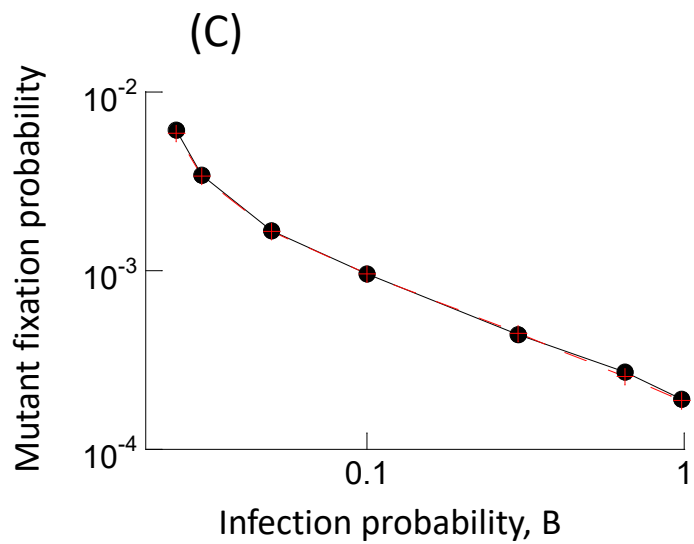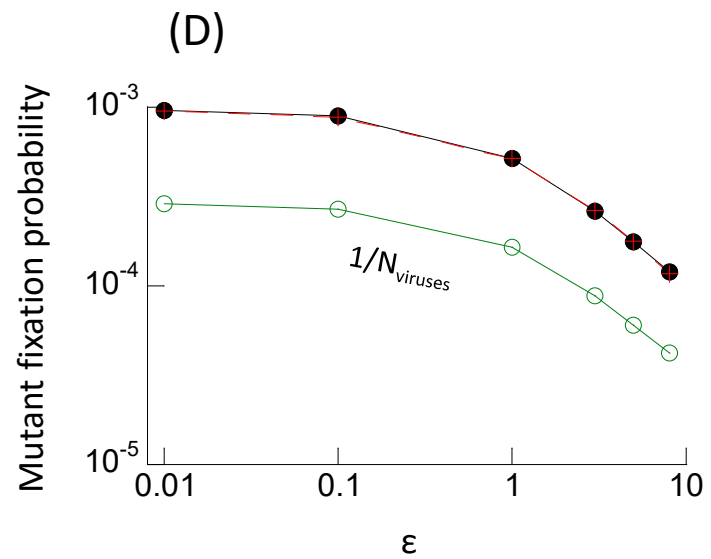

Fig2

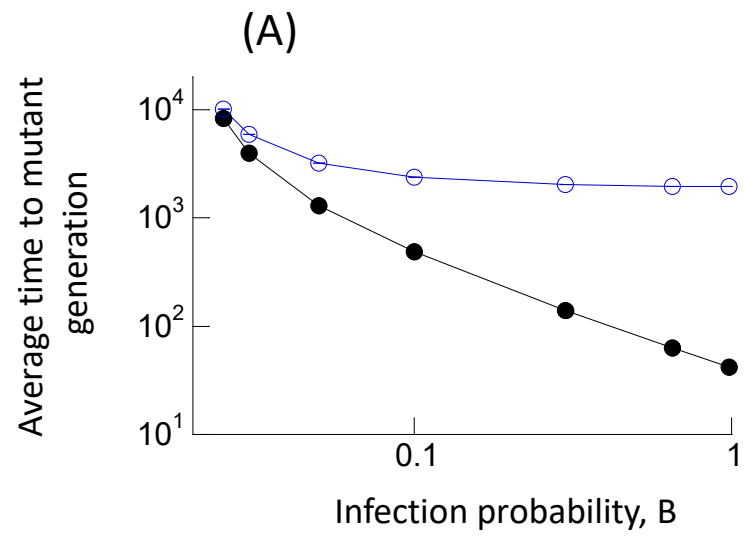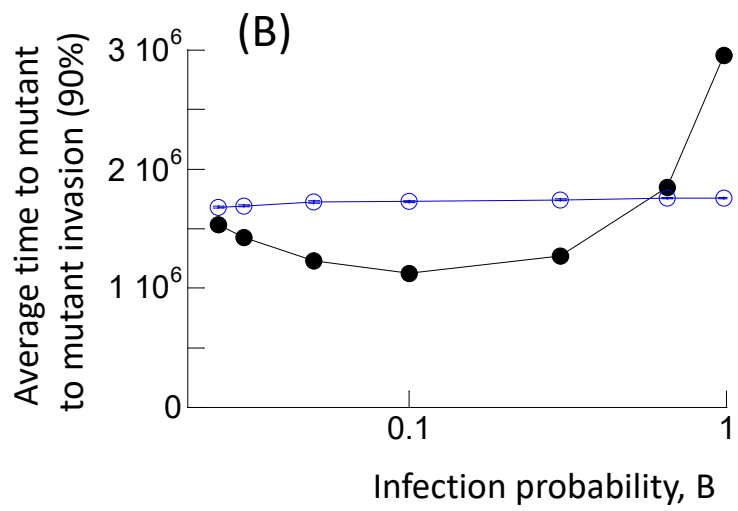

Fig3

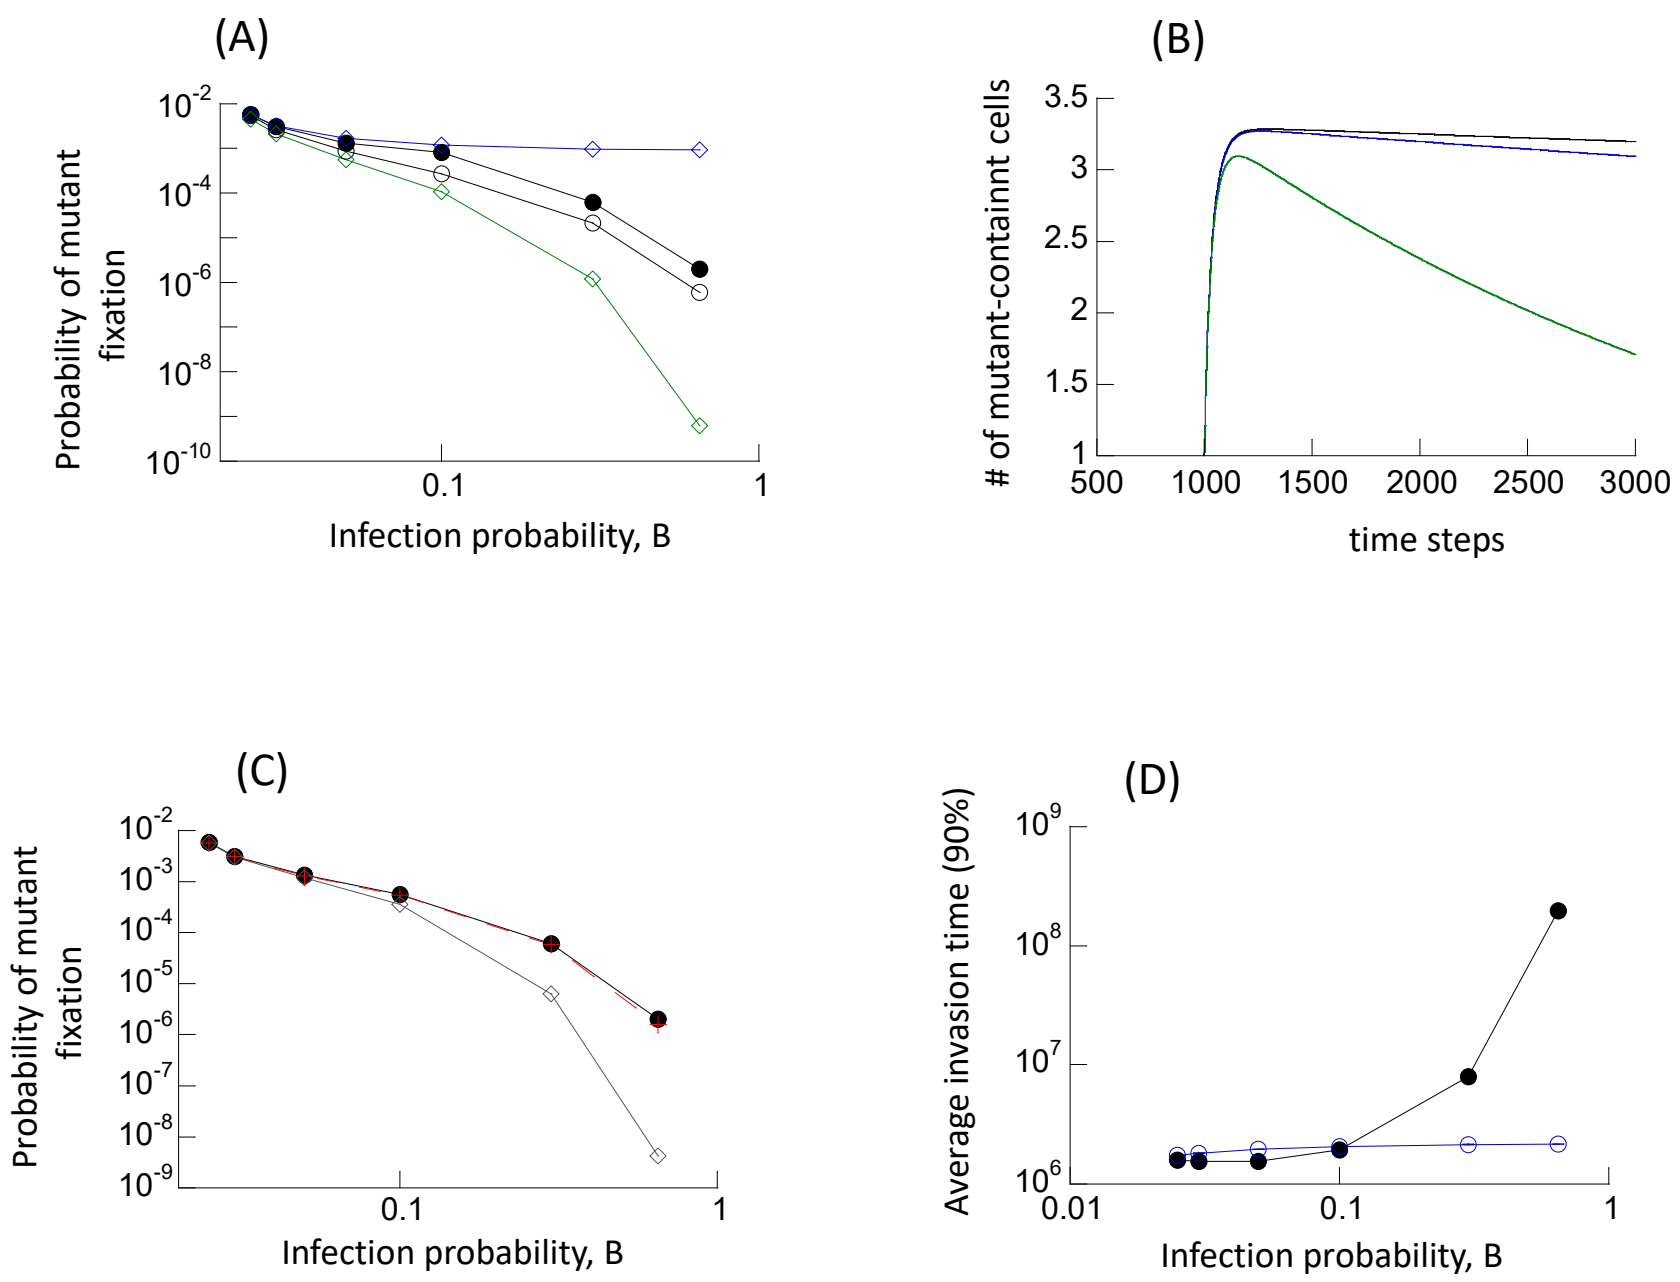

Fig4



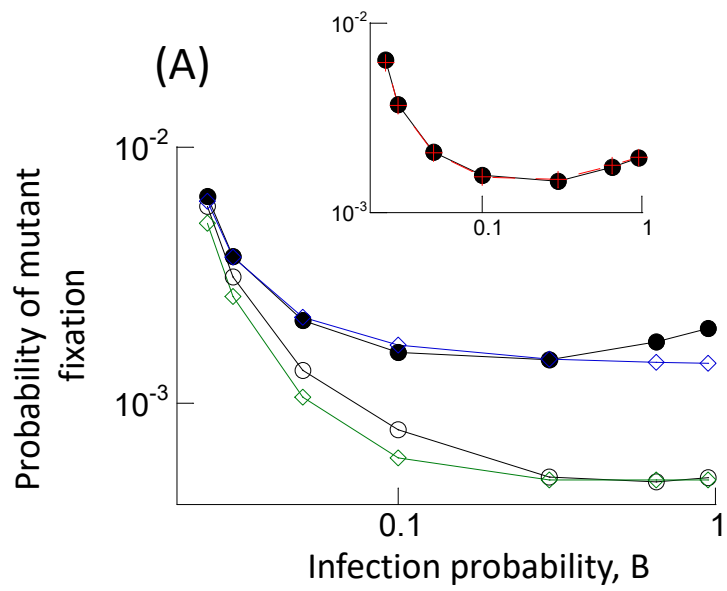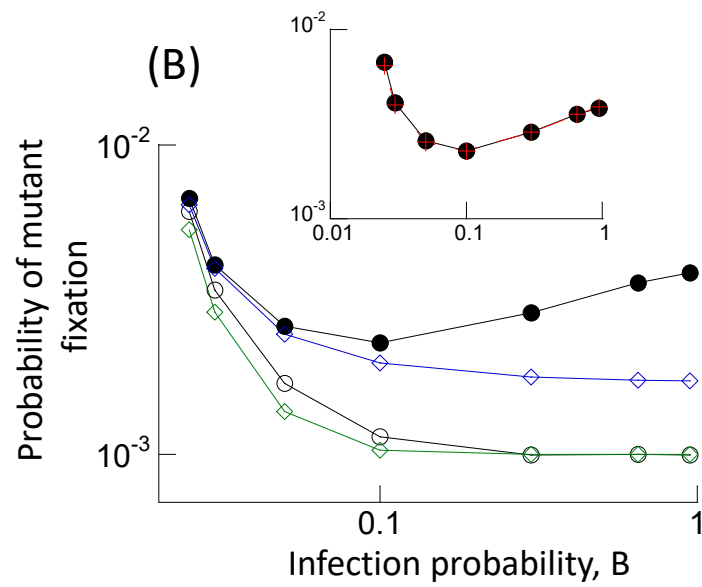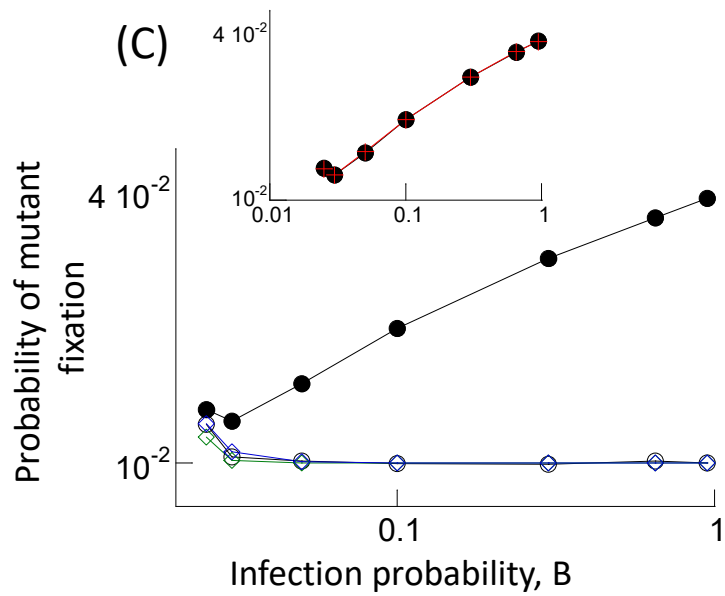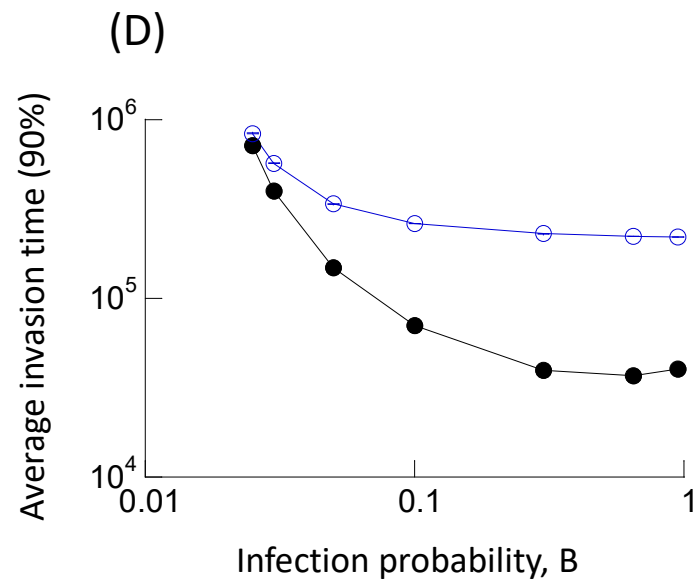

Fig5

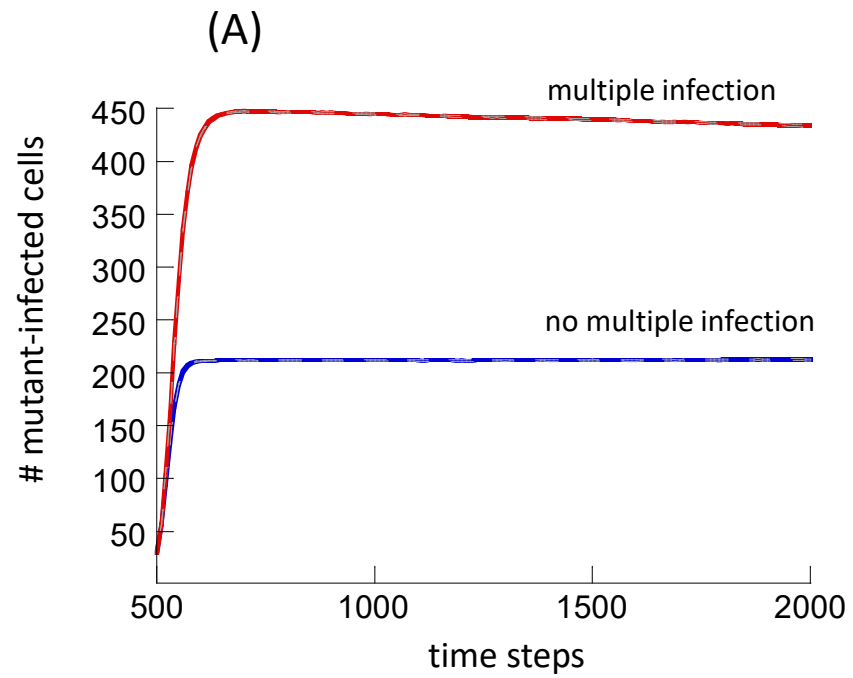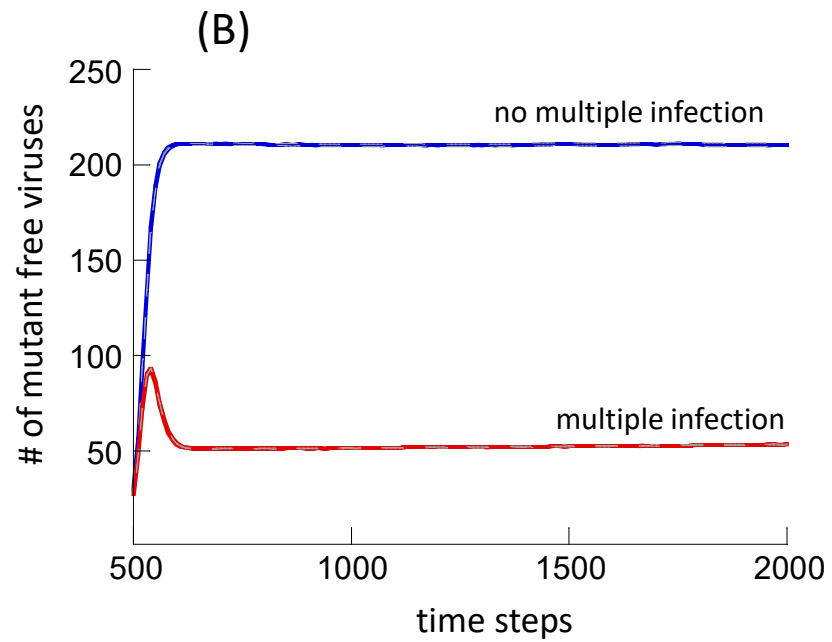

Fig6
